# Supplementary material for: An Evaluation of the Pharmacokinetics, Safety, and Tolerability of Aclidinium/Formoterol Fixed-Dose Combination Administered in Chinese Patients with Moderate-to-Severe Chronic Obstructive Pulmonary Disease
Source: Springer Nature journal article supplement (doi:10.1007/s40268-021-00374-z), 2022-02-08
Supplement: MOESM1 [file 24126446]

## Supplementary Information

### **An Evaluation of the Pharmacokinetics, Safety, and Tolerability of Aclidinium/Formoterol Fixed-Dose Combination Administered in Chinese Patients with Moderate-to-Severe Chronic Obstructive Pulmonary Disease**

*Drugs in R&D*

Hong Zhang<sup>1</sup>, Sami Z. Daoud<sup>2</sup>, Michael S. Gillen<sup>2</sup>, Natalia Calderon<sup>3</sup>, Maria Heijer<sup>3</sup>, Eduard Molins<sup>4</sup>, Esther Garcia-Gil<sup>4</sup>, Hong Chen<sup>1</sup>, Qianqian Li<sup>1</sup>, Chengjiao Liu<sup>1</sup>, Yanhua Ding<sup>1</sup>

<sup>1</sup>Phase I Clinical Trial Unit, The First Hospital of Jilin University, Jilin, China.

<sup>2</sup>BioPharmaceuticals R&D, AstraZeneca, Gaithersburg, MD, USA.

<sup>3</sup>BioPharmaceuticals R&D, AstraZeneca, Gothenburg, Sweden.

<sup>4</sup>BioPharmaceuticals R&D, AstraZeneca, Barcelona, Spain.

**Corresponding author:** Dr. Yanhua Ding, Phase I Clinical Trial Unit, The First Hospital,

Jilin University, No 71, Xinmin Street, Changchun 130021, China; Tel/Fax: +86-431-

88782705; Email: dingyanh@jlu.edu.cn

**TABLE S1** Permitted medications

| <b>Allowed medication</b>                                  | <b>Restrictions</b>                                                                                                                                                                                                                                                                                                                                                   | <b>Stabilization period</b> |
|------------------------------------------------------------|-----------------------------------------------------------------------------------------------------------------------------------------------------------------------------------------------------------------------------------------------------------------------------------------------------------------------------------------------------------------------|-----------------------------|
| ICS <sup>a</sup>                                           | Patients who were following a stable regimen of a LABA/ICS combination for at least 4 weeks could be switched to the same ICS as monotherapy without requiring a stabilization period. If treatment was switched to a different ICS monotherapy, a stabilization period of $\geq 14$ days, until the patient was considered stabilized, was required before screening | 4 weeks                     |
| Continuous oral or parenteral corticosteroids <sup>a</sup> | Dose equivalent of $\leq 10$ mg of prednisone per day or 20 mg every other day                                                                                                                                                                                                                                                                                        | 4 weeks                     |
| Selective $\beta$ -blocking agents                         | -                                                                                                                                                                                                                                                                                                                                                                     | 2 weeks                     |
| Oxygen therapy <sup>a</sup>                                | <15 hours a day                                                                                                                                                                                                                                                                                                                                                       | 4 weeks                     |
| Oral sustained-release theophyllines <sup>a</sup>          | Theophylline was to be avoided the morning of study visits and begin after visit completion.                                                                                                                                                                                                                                                                          | 4 weeks                     |

<sup>a</sup>Change in daily dose, dosing schedule, formulation or treatment was unlikely during the course of the trial (the exception being the treatment of a COPD exacerbation)

COPD chronic obstructive pulmonary disease, ICS inhaled corticosteroid, LABA long-acting  $\beta_2$ -agonist

**TABLE S2** Prohibited medications

| <b>Prohibited medication/</b>                                                                                      | <b>Washout</b> |
|--------------------------------------------------------------------------------------------------------------------|----------------|
| SABAs                                                                                                              | 6 h            |
| SAMAs or a combination of SABAs+SAMA                                                                               | 12 h           |
| Oral, intra-nasal or parenteral anticholinergic agents                                                             | 14 days        |
| Once- or twice-daily LAMAs; once- or twice-daily LABAs; oral LABAs                                                 | 14 days        |
| Combination of LABA+ICS or LABA+LAMA                                                                               | 14 days        |
| Methylxanthines, leukotriene modifiers and PDE IV inhibitors                                                       | 14 days        |
| Continuous oral or parenteral corticosteroids equivalent to >10 mg of prednisone per day or >20 mg every other day | 14 days        |
| Non-selective $\beta$ -blocking agents <sup>a</sup>                                                                | 14 days        |
| Herbal/traditional Chinese medicine                                                                                | 30 days        |

<sup>a</sup>Could be switched to selective  $\beta_1$ -blocking agents, as long as they were at stable dose for  $\geq 2$  weeks prior to Visit 1

LABA long-acting  $\beta_2$ -agonist, LAMA long-acting muscarinic antagonist, PDE IV phosphodiesterase type 4 inhibitor, SABA short-acting  $\beta_2$ -agonist, SAMA short-acting muscarinic antagonist

**TABLE S3** PK parameters of inactive metabolites of acridinium (PK analysis set)

| <b>Parameter</b>                         | <b>LAS34850</b>       |                       | <b>LAS34823</b>       |                       |
|------------------------------------------|-----------------------|-----------------------|-----------------------|-----------------------|
|                                          | <b>Day 1 (n = 20)</b> | <b>Day 5 (n = 19)</b> | <b>Day 1 (n = 20)</b> | <b>Day 5 (n = 19)</b> |
| $C_{\max}$ , mean pg/mL (CV%)            | 3,149 (55.6)          | 3,691 (56.0)          | 38.82 (86.6)          | 81.02 (69.5)          |
| $T_{\max}$ , median h (range)            | 3.00 (1.50–6.00)      | 3.00 (0.08–4.00)      | 1.75 (0.08–4.00)      | 0.50 (0.08–3.00)      |
| $AUC_{\tau}$ , mean h·pg/mL (CV%)        | 20,330 (54.2)         | 27,300 (52.3)         | 252.9 (60.6)          | 540.9 (55.0)          |
| $AUC_{\text{last}}$ mean h·pg/mL (CV%)   | 20,280 (54.3)         |                       | 201.1 (106.3)         |                       |
| $t_{1/2}$ , mean h (range)               |                       | 20.95 (8.77–93.3)     |                       | 17.34 (6.97–39.6)     |
| MR $C_{\max}$ , mean (CV%)               | 68.72 (77.2)          | 60.65 (82.9)          | 0.85 (39.1)           | 1.33 (63.1)           |
| MR $AUC_{\tau}$ , mean (CV%)             | 237.90 (71.9)         | 161.70 (45.0)         | 2.75 (36.7)           | 3.20 (35.7)           |
| $R_{\text{ac}}(C_{\max})$ , mean (CV%)   |                       | 1.19 (80.3)           |                       | 2.07 (113.5)          |
| $R_{\text{ac}}(AUC_{\tau})$ , mean (CV%) |                       | 1.36 (76.5)           |                       | 2.16 (82.0)           |

$AUC_{last}$  area under the plasma concentration–time curve from time zero to the time of last quantifiable concentration,  $AUC_{\tau}$  area under the concentration–time curve during a dosage interval ( $\tau$ ),  $C_{max}$  maximum concentration,  $CV\%$  coefficient of variation, MR metabolite ratio, *PK* pharmacokinetics,  $Rac(AUC_{\tau})$  accumulation ratio calculated from  $AUC_{\tau}$ ,  $Rac(C_{max})$  accumulation ratio calculated from  $C_{max}$ ,  $t_{1/2}$  elimination half-life,  $T_{max}$  time to reach maximum concentration

**TABLE S4** TEAEs (safety analysis set)

|                                       | <b>n (%)</b> | <b>Events</b> |
|---------------------------------------|--------------|---------------|
| Any TEAE                              | 5 (25%)      | 9             |
| Proteinuria <sup>a</sup>              | 3 (15%)      | 3             |
| Blood pressure increased <sup>b</sup> | 1 (5%)       | 1             |
| Bronchitis <sup>c</sup>               | 1 (5%)       | 1             |
| Dermatitis                            | 1 (5%)       | 1             |
| Hematuria <sup>a</sup>                | 1 (5%)       | 1             |
| Headache <sup>b</sup>                 | 1 (5%)       | 1             |
| Rhinorrhea                            | 1 (5%)       | 1             |

Total *N* = 20

<sup>a</sup>All possibly treatment-related according to investigator's assessment; in two patients, this was already present at baseline

<sup>b</sup> $\beta_2$ -adrenergic event

<sup>c</sup>SAE leading to discontinuation; possibly not treatment-related according to investigator's assessment

SAE serious adverse event, TEAE treatment-emergent adverse event

**Fig. S1** Patients with poor inhalation technique: **a** Patient 1, **b** Patient 2, **c** Patient 3, **d** Patient 4, and **e** Patient 5

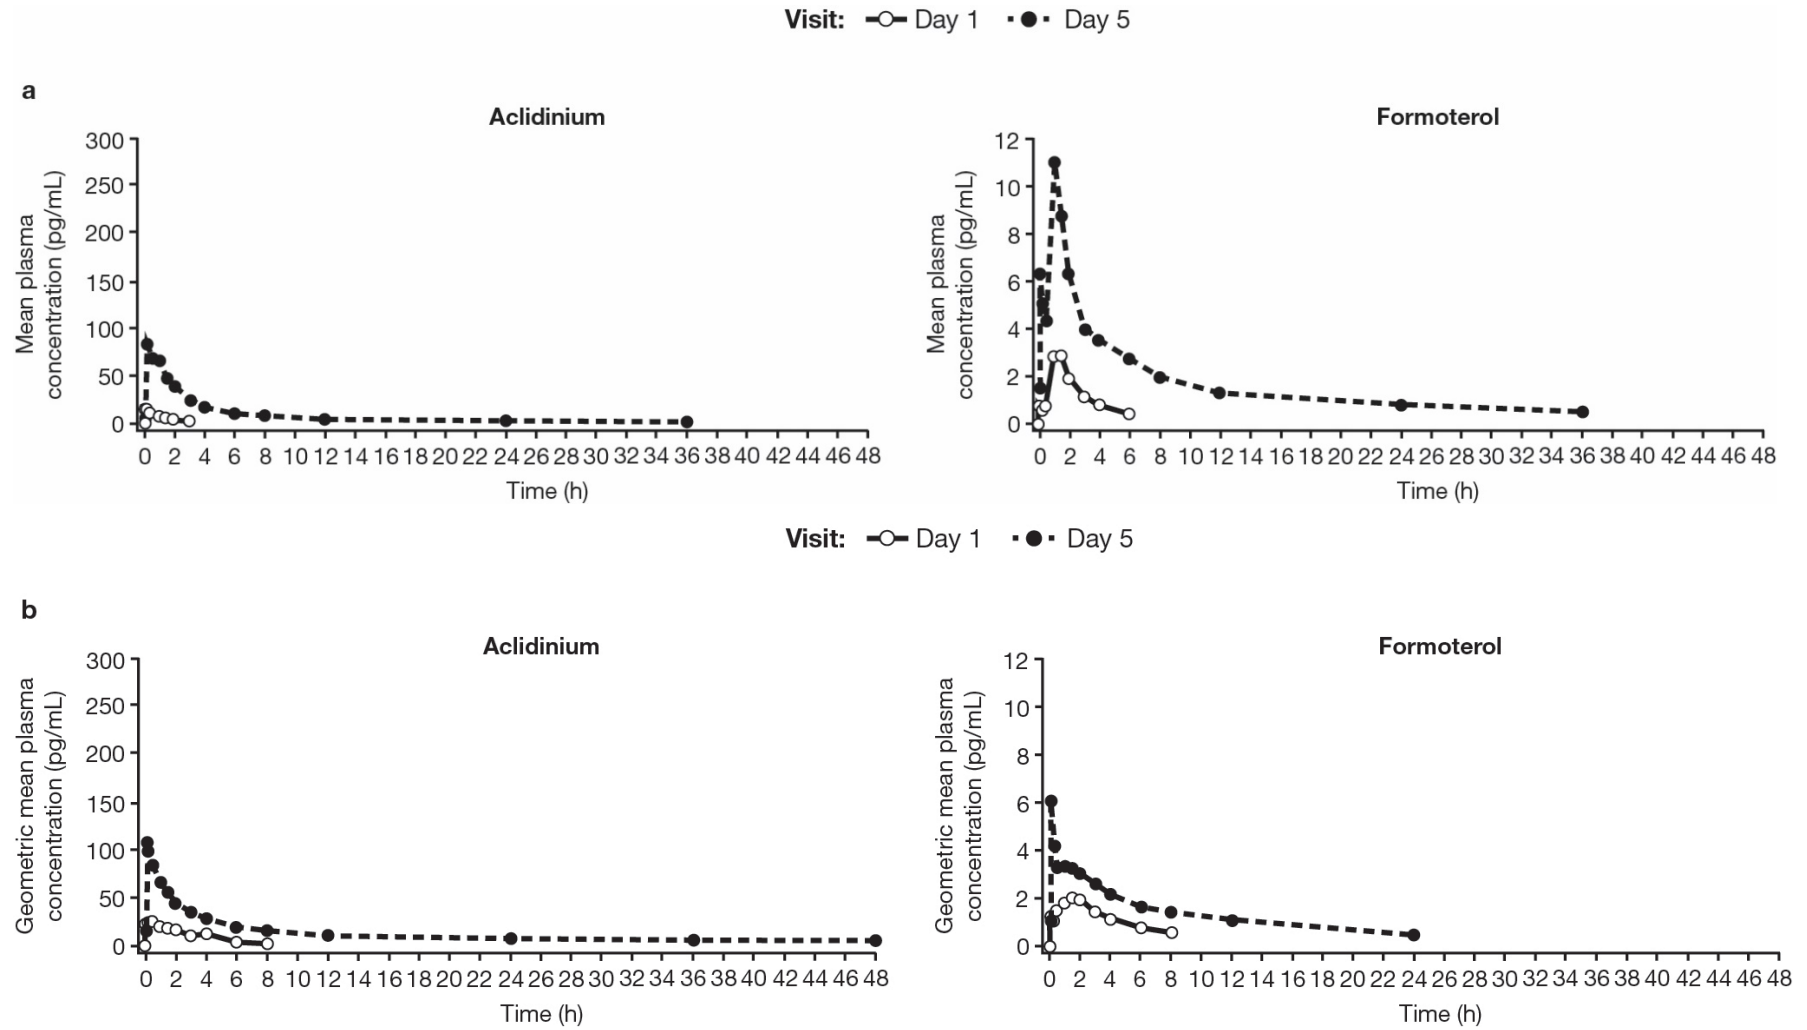

Visit: —○— Day 1    ●● Day 5

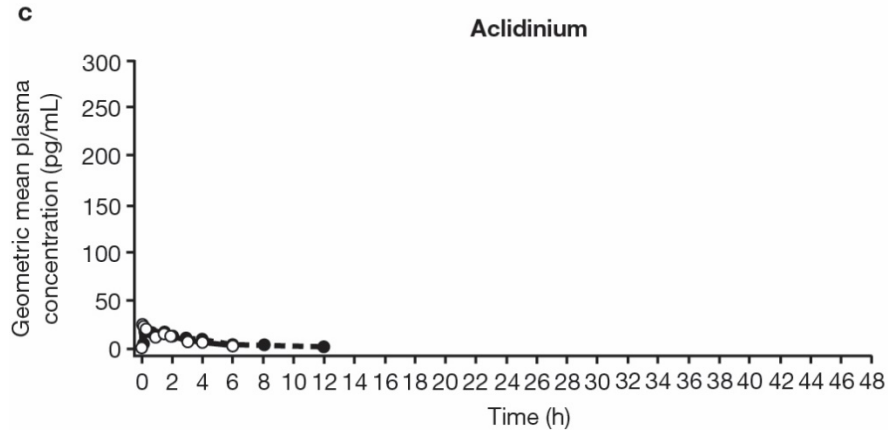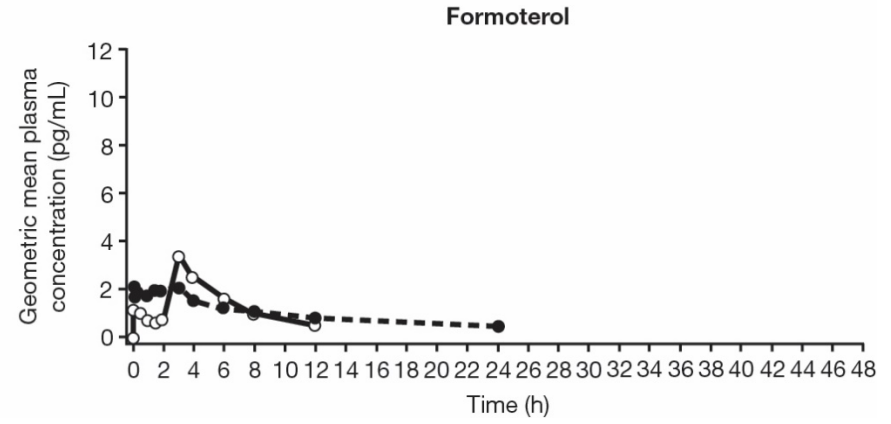

Visit: —○— Day 1    ●● Day 5

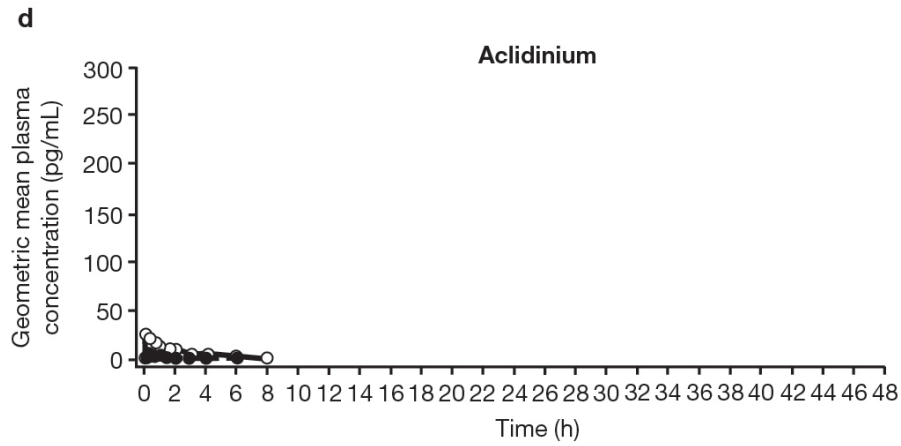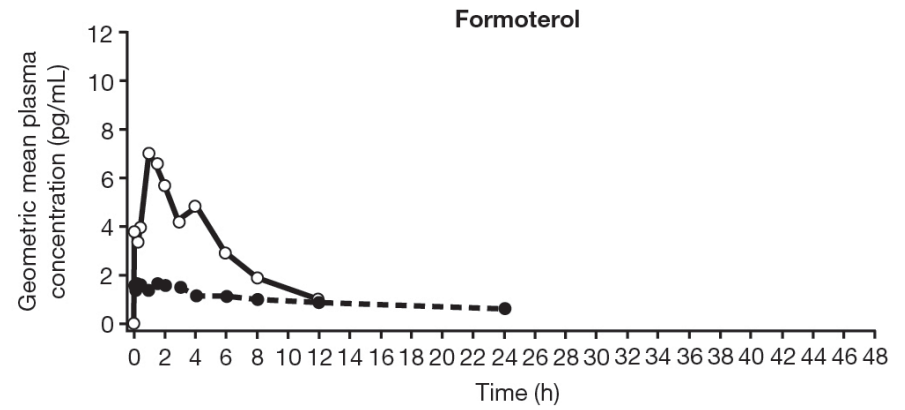



Visit: ○ Day 1 ● Day 5

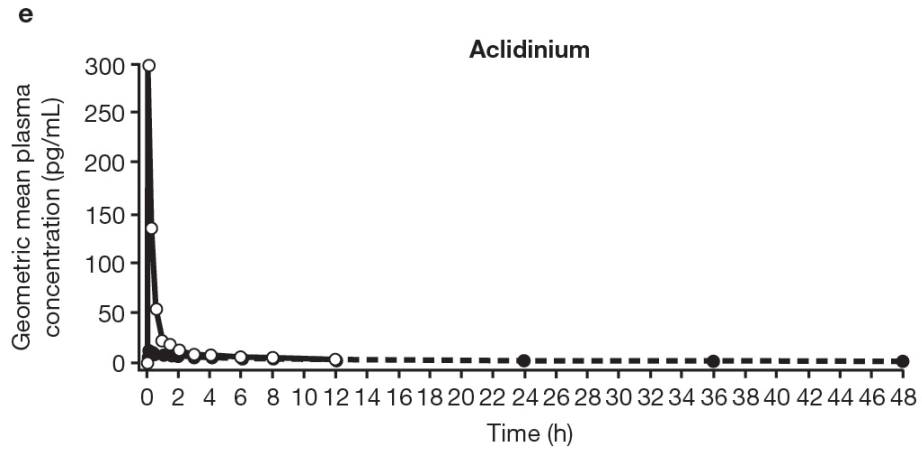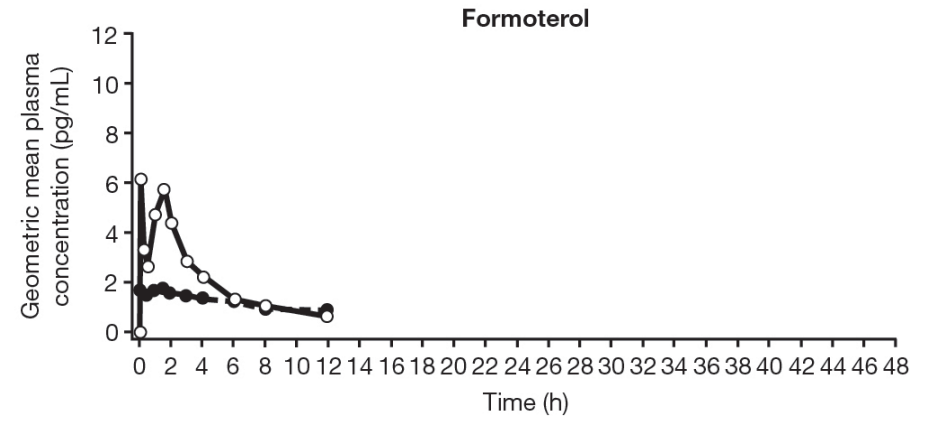

**Fig. S2** Mean patient **a** blood pressure and **b** heart rate (safety population)

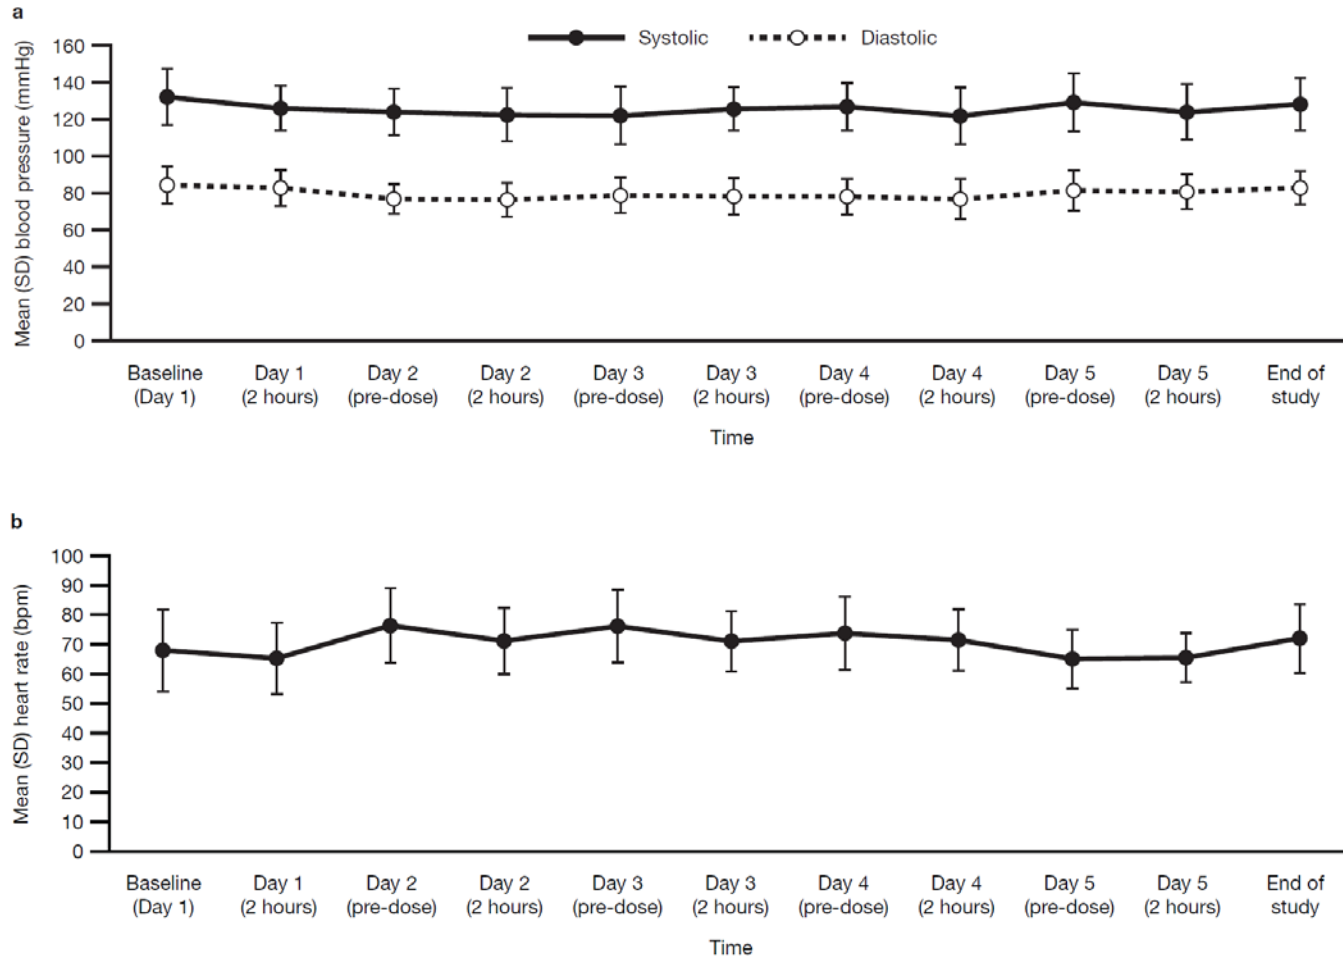

SD, standard deviation
